# Supplementary material for: Complement in Reproductive White Adipose Tissue Characterizes the Obese Preeclamptic-Like BPH/5 Mouse Prior to and During Pregnancy
Source: MDPI journal article supplement (doi:10.3390/biology9090304), 2020-09-22
Supplement: s1 [file s1]

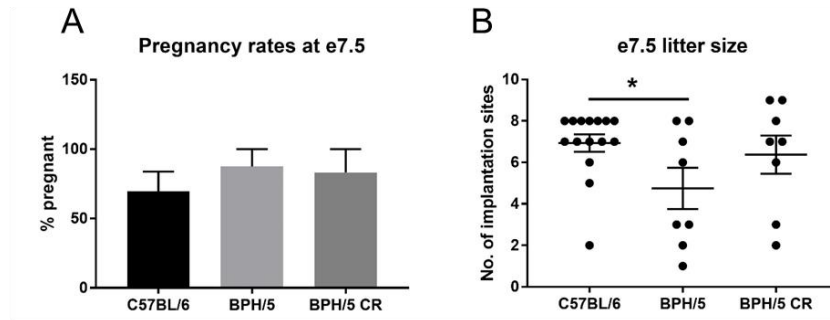

**Figure S1.** Calorie restriction does not impact pregnancy rates not litter size in BPH/5 early pregnancy. (A) Percent of ad libitum fed C57BL/6 and BPH/5 as well as calorie restricted (CR) BPH/5 mice that become pregnant after timed mating ( $n = 4-9$ ). (B) Measurement of litter size in ad libitum fed C57BL/6 and BPH/5 as well as CR BPH/5 mice ( $n = 8-15$ , \*  $p < 0.05$ ). Data are expressed as mean  $\pm$  SEM.

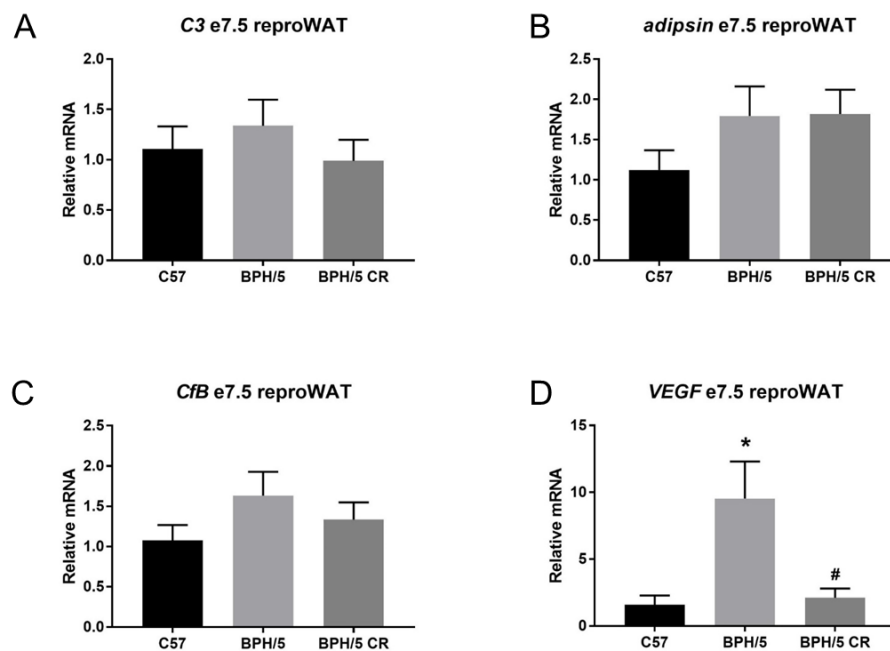

**Figure S2.** Vascular endothelial growth factor (VEGF) mRNA is increased in ad libitum fed BPH/5 reproductive (repro) WAT in early pregnancy. (A) qRT-PCR analysis of complement factor 3 (C3), (B) complement factor D (adipsin), (C) complement factor B (CfB) and (D) vascular endothelial growth factor (VEGF) mRNA expression in reproductive (repro) WAT from e7.5 pregnant ad libitum fed C57 and BPH/5, and calorie restricted (CR) BPH/5 mice ( $n = 5-6$ , \*  $p < 0.05$  vs C57, #  $p < 0.05$  vs BPH/5 ad libitum). Data are expressed as mean  $\pm$  SEM.

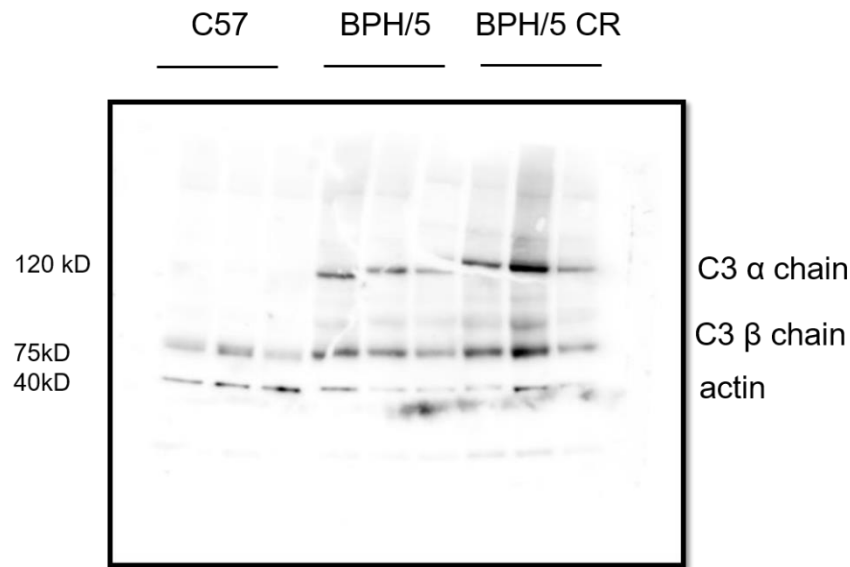

**Figure S3.** Complement factor 3 (C3) protein is increased in BPH/5 reproductive (repro) WAT in early pregnancy. Annotated western blot gel of actin and C3 denatured ( $\alpha$  and  $\beta$  chains) protein levels in repro WAT.  $n = 3$  per group.

**Table S1.** Forward and reverse primer sequences for complement component 3 (C3), complement factor B (CfB), complement factor D (adipsin), vascular endothelial growth factor (VEGF), and placental growth factor (PlGF). Primer sequences were obtained from published literature referenced above. These primer sequences were used in qRT-PCR experiments.

| Gene    | Forward Sequence       | Reverse Sequence       | Reference |
|---------|------------------------|------------------------|-----------|
| C3      | CACCGCCAAGAATCGCTAC    | GATCAGGTGTTTCAGCCGC    | [1]       |
| CfB     | GAAACCTGTCACTGTCATTC   | CCCCAAACACATACACATCC   | [1]       |
| Adipsin | GCTATCCCAGAATGCCTCGTT  | CCACTTCTTTGTCCTCGATTGC | [2]       |
| VEGF    | CTTGTCAGAGCGGAGAAAGC   | CATCTGCAAGTACGTTTCGTT  | [3]       |
| PlGF    | TCTGCTGGGAACAACCTCAACA | GTGAGACACCTCATCAGGGTAT | [3]       |

## References

1. Sones, J.L.; Merriam, A.A.; Seffens, A.; Brown-Grant, D.-A.; Butler, S.D.; Zhao, A.M.; Xu, X.; Shawber, C.J.; Grenier, J.K.; Douglas, N.C. Angiogenic factor imbalance precedes complement deposition in placentae of the BPH/5 model of preeclampsia. *FASEB J.* **2018**, *32*, 2574–2586, doi:10.1096/fj.201701008r.
2. Searfoss, G.H.; Jordan, W.H.; Calligaro, D.O.; Galbreath, E.J.; Schirtzinger, L.M.; Berridge, B.R.; Gao, H.; Higgins, M.A.; May, P.C.; Ryan, T.P. Adipsin, a biomarker of gastrointestinal toxicity mediated by a functional gamma-secretase inhibitor. *J. Biol. Chem.* **2003**, *278*, 46107–46116.
3. Woods, A.K.; Hoffmann, D.S.; Weydert, C.J.; Butler, S.D.; Zhou, Y.; Sharma, R.V.; Davisson, R.L. Adenoviral delivery of VEGF121 early in pregnancy prevents spontaneous development of preeclampsia in BPH/5 mice. *Hypertension* **2010**, *57*, 94–102, doi:10.1161/HYPERTENSIONAHA.110.160242.
